# Supplementary material for: Diverse stimuli engage different neutrophil extracellular trap pathways
Source: eLife. 2017 Jun 2;6:e24437. doi: 10.7554/eLife.24437 (PMC5496738; doi:10.7554/eLife.24437)
Supplement: Figure 1—source data 1. — DOI: http://dx.doi.org/10.7554/eLife.24437.004 [file elife-24437-fig1-data1.xlsx]

## Sheet: Sheet1
fig 1A				% NETs
	NS	PMA	A23	Nig	C. alb	GBS
exp1	11.5619	65.2031	82.0659	82.646	35.1932	67.4768
exp2	2.64656	66.126	87.8154	78.9214	60.3692	69.0247
exp3	11.154	71.4427	75.4571	51.1078	61.5538	95
