# Supplementary material for: Diverse stimuli engage different neutrophil extracellular trap pathways
Source: eLife. 2017 Jun 2;6:e24437. doi: 10.7554/eLife.24437 (PMC5496738; doi:10.7554/eLife.24437)
Supplement: Figure 2—source data 1. — DOI: http://dx.doi.org/10.7554/eLife.24437.013 [file elife-24437-fig2-data1.xlsx]

## Sheet: Sheet1
fig 2A-C PKCi							% NETs
	NS	NS PKCi	PMA	PMA PKCi	A23	A23 PKCi	Nig	Nig PKCi	C.alb	C.alb PKCi	GBS	GBS PKCi
exp1	17	8	86	8	42	47	57	73	37	23	82	46
exp2	9	8	83	28	61	84	76	85	30	18	49	33
exp3	11	3	80	28	69	81	80	85	46	22	50	21
fig 2D-F BAPTA							% NETs
	NS	NS BAPTA	PMA	PMA BAPTA	A23	A23 BAPTA	Nig	Nig BAPTA	C.alb	C.alb BAPTA	GBS	GBS BAPTA
exp1	1	4	53	4	64	26	91	34	56	57	31	32
exp2	4	12	52	29	64	83	81	54	54	74	75	75
exp3	11	17	80	38	69	68	80	44	46	32	46	50
fig 2G-I Actinomycin D							% NETs
	NS	NS ActD	PMA	PMA ActD	A23	A23 ActD	Nig	Nig ActD	C.alb	C.alb ActD	GBS	GBS ActD
exp1	1	1	47	43	80	91	93	86	44	56	60	77
exp2	1	4	53	46	64	71	91	92	56	67	31	28
exp3	4	10	46	43	83	75	81	77	36	75	75	56
