# Supplementary material for: Diverse stimuli engage different neutrophil extracellular trap pathways
Source: eLife. 2017 Jun 2;6:e24437. doi: 10.7554/eLife.24437 (PMC5496738; doi:10.7554/eLife.24437)
Supplement: Figure 3—source data 1. — This data also shows the means from seven independent experiments with CGD patient neutrophils and was used to generate the histograms in Figure 3G–I. DOI: http://dx.doi.org/10.7554/eLife.24437.015 [file elife-24437-fig3-data1.xlsx]

## Sheet: Sheet1
fig 3 D-F pyrocatechol							% NETs
	NS	NS pyro	PMA	PMA pyro	A23	A23 pyro	Nig	Nig pyro	C.alb	C.alb pyro	GBS	GBS pyro
exp1	3.25145	2.37872	52.1611	12.8178	37.2269	41.18	76.2161	77.2579	27.2486	13.5689	74.1057	87.0314
exp2	12.141	16.7609	83.8958	6.02574	65.2146	53.7571	89.7286	68.7815	43.5251	25.3546	89.4254	89.7718
exp3	0.822225	2.36044	56.2508	13.3302	80.1272	95.2375	92.6298	88.6873	45.8053	28.23	59.6726	67.0503
fig 3 G-I CGD patients							% NETs
	NS	NS CGD	PMA	PMA CGD	A23	A23 CGD	Nig	Nig CGD	C.alb	C.alb CGD	GBS	GBS CGD
exp1	3.1959	3.72817	72.4291	2.4721	73.2653	53.0997	90.3771	84.5612	26.0647	41.7531	67.2945	48.4794
exp2	7.82343	2.13523	73.7275	2.87044			77.5817	66.2169	20.4048	25.6728	86.4325	44.7378
exp3	4.14934	2.11904	50.5996	3.9425	67.5161	67.1946	40.9528	41.2679	46.1431	59.6346	65.8627	57.7582
exp4	7.85668	13.0665	48.4161	6.49825	62.5767	84.0809	75.6053	56.9533	21.8946	34.3826	40.6877	21.3604
exp5	5.29392	0.577196	64.0826	4.73262	54.3699	55.4151	88.2651	87.5473	34.4498	30.2547	59.3967	42.882
exp6	11.9755	1.77851	65.504	5.66565	78.545	76.5238			28.985	32.6955
exp7	3.84007	15.2409	80.4657	16.5497	60.1795	60.5169	88.9232	81.7011
