# Supplementary material for: Diverse stimuli engage different neutrophil extracellular trap pathways
Source: eLife. 2017 Jun 2;6:e24437. doi: 10.7554/eLife.24437 (PMC5496738; doi:10.7554/eLife.24437)
Supplement: Figure 5—source data 1. — DOI: http://dx.doi.org/10.7554/eLife.24437.021 [file elife-24437-fig5-data1.xlsx]

## Sheet: Sheet1
fig 5A-C Nei							% NETs
	NS	NS Nei	PMA	PMA Nei	A23	A23 Nei	Nig	Nig Nei	C.alb	C.alb Nei	GBS	GBS Nei
exp1	3.2405	4.83538	73.7666	33.8352	73.6784	67.1476	44.0292	51.5575	55.8086	32.5253	88.232	51.2448
exp2	11.5619	18.2691	65.2031	24.5159	82.0659	87.5178	68.2999	58.7916	35.1932	17.6329	78.0828	47.9209
exp3	2.82979	3.62141	54.4312	13.4189	44.2034	44.4064	73.9134	51.4017	41.3586	21.2554	52.9277	37.0468
