# Supplementary material for: Diverse stimuli engage different neutrophil extracellular trap pathways
Source: eLife. 2017 Jun 2;6:e24437. doi: 10.7554/eLife.24437 (PMC5496738; doi:10.7554/eLife.24437)
Supplement: Figure 6—source data 1. — DOI: http://dx.doi.org/10.7554/eLife.24437.023 [file elife-24437-fig6-data1.xlsx]

## Sheet: Sheet1
fig 6E-G PAD inhibitors													% NETs
	NS	NS cl-am	NS BB-cl	NS TDFA	PMA	PMA cl-am	PMA BB-cl	PMA TDFA	A23	A23 cl-am	A23 BB-cl	A23 TDFA	Nig	Nig cl-am	Nig BB-cl	Nig TDFA	C.alb	C.alb cl-am	C.alb BB-cl	C.alb TDFA	GBS	GBS cl-am	GBS BB-cl	GBS TDFA
exp1	5.2182	13.7932	10.0102	15.0364	62.6754	71.1324	66.4809	61.8663	86.5621	82.7187	81.519	81.1693	72.2854	71.2596	52.9142	66.7536	46.442	42.0733	38.7272	37.3263	73.9649	71.6798	69.5941	73.1421
exp2	9.58492	10.8736	14.0233	10.3581	87.5107	82.1899	85.2208	85.3337	69.4006	83.2604	95.2098	64.8445	80.7807	91.8019	83.1579	76.8081	36.5384	45.3722	32.5356	31.6185	59.5186	56.8817	72.922	56.7783
exp3	6.06202	6.38845	6.1499	3.08804	83.2715	83.4073	81.9876	78.2204	80.2594	90.4873	93.3019	93.0036	94.5357	91.5896	88.225	88.8284	31.9817	26.6014	29.5443	24.4769	39.7959	50.0188	41.8486	42.8053
exp4	8.47437	7.77537	7.71119	9.16299	73.1294	76.801	80.9827	70.9273	74.2379	76.2539	68.1737	72.3796	72.954	72.3628	73.4189	81.5319	26.3284	22.7791	23.5671	25.0771	74.0456	72.0189	85.2543	67.3943
exp5	3.57142	3.92296	12.7869	4.06501	90.6119	92.0556	85.8708	88.1007	82.2567	84.6437	90.9213	79.09	75.6132	76.1365	87.1616	79.6454	41.5163	41.4899	35.9542	39.6982	43.5195	39.0209	57.5567	39.412
exp6	6.88097	5.5893	7.84934	4.17454	53.4064	49.9741	50.9401	54.0043	89.3839	89.3134	88.5376	87.0054	66.8728	73.2934	65.1428	77.2674	24.2253	29.0799	33.5989	39.5619	49.1311	46.4729	54.3736	45.306
exp7	7.94149	8.35769	13.0591	7.86028	67.1349	77.8586	59.6583	66.2552	83.6893	85.645	83.769	85.8944	79.7713	85.8799	73.6033	79.0207	64.2012	68.0452	61.0543	62.3712	44.9538	43.0469	45.4358	43.6132
exp8	10.3722	7.23492	14.0692	9.09821	88.4949	90.0943	87.1757	88.4949	90.6844	89.4301	87.1746	86.3366	91.3629	86.7934	87.4772	93.7088	32.1622	32.6941	33.6634	39.1058	72.5041	77.6145	83.7001	78.4796
exp9	10.7919	3.44223	6.4955	6.30169	87.0062	83.8197	88.6674	87.0062	90.4941	85.1813	86.0333	79.9156	94.4317	88.8474	90.5757	88.0104	33.0276	35.3306	30.7304	37.2133	67.3275	66.8185	64.1298	63.6605
exp10	4.16255	3.6323	7.76424	2.35679	65.0187	67.1292	67.6141	65.0187	67.198	60.1274	83.9862	77.3082	76.0995	81.285	69.781	79.0174	34.1354	33.663	31.5021	34.4506	72.7222	63.5256	75.3962	66.2266
