# Supplementary material for: Diverse stimuli engage different neutrophil extracellular trap pathways
Source: eLife. 2017 Jun 2;6:e24437. doi: 10.7554/eLife.24437 (PMC5496738; doi:10.7554/eLife.24437)
Supplement: Figure 8—source data 1. — This data also shows the mean of three independent NETosis experiments in response to staurosporine (Figure 8D), hemolysin (to induce necrosis), TNF-α, Z-VAD-FMK and a SMAC mimetic or cycloheximide (to induce necroptosis) and was used to generate Figure 8E. DOI: http://dx.doi.org/10.7554/eLife.24437.028 [file elife-24437-fig8-data1.xlsx]

## Sheet: Sheet1
fig 8 A-C										% NETs
	NS	NS casp3	NS nec	PMA	PMA casp3	PMA nec	A23	A23 casp3	A23 nec	Nig	Nig casp3	Nig nec	C.alb	C.alb casp3	C.alb nec	GBS	GBS casp3	GBS nec
exp1	10	11	5	63	73	61	41	69	70	64	76	53	42	50	36	38	49	41
exp2	16	11	20	85	86	65	57	89	76	64	82	72	70	51	75	65	65	36
exp3	11	9	8	80	93	81	69	79	78	80	75	72	46	41	41	46	42	39
fig 8D				% NETs
	NS 2.5hr	NS 6hr	500nM staurosporin 2hr	500nM staurosporin 4hr	500nM staurosporin 6hr	50nM PMA 2.5hr
exp1	4	31	1	9	10	57
exp2	2	25	4	2	7	74
exp3	1	23	0	2	2	80
fig 8E				% NETs
	NS 2.5hr	NS 6hr	25ug/ml hemolysin 6hr	50ng/ml TNF, 50uM z-VAD &	50ng/ml TNF, 50uM z-VAD &	50nM PMA 2.5hr
exp1	1	4	13	8	17	55
exp2	2	25	37	33	13	74
exp3	1	23	21	26	24	80
