# Supplementary material for: Diverse stimuli engage different neutrophil extracellular trap pathways
Source: eLife journal article supplement (doi:10.7554/elife.24437), 2017-06-02
Supplement: supp [file elife_poa_e24437_figure_4_Source_Data_1.xlsx]

## Sheet: Sheet1
fig 4A-C ABAH							% NETs
	NS	NS abah	PMA	PMA abah	A23	A23 abah	Nig	Nig abah	C.alb	C.alb abah	GBS	GBS abah
exp1	12.141	10.4778	91.3086	26.5212	65.2146	55.8689	87.4384	77.3084	24.6894	10.39	89.4254	53.3649
exp2	12.2949	8.24135	92.7744	16.9192	80.1272	92.7448	87.0842	84.806	32.3898	21.1541	71.6741	34.7297
exp3	3.25145	2.2937	49.2025	11.4744	42.2606	32.8374	76.2161	70.9321	39.3934	26.057	75.3846	23.7459
fig 4 D-F MPO-patient: data shown is a represetative of 2 independent experiments with a single donor							% NETs
	NS control	NS MPO	PMA control	PMA MPO	A23 control	A23 MPO	Nig control	Nig MPO	C.alb control	C.alb MPO	GBS control	GBS MPO
	11.2676	0.793651	73.8461	4.41176	85.9375	68.718	75.6522	69.5652	44.4444	20.8333	65.5556	17.8571
	8.19672	0	71.4286	6.42857	87.9032	63.1841	72.1429	86.3014	41.6667	24.183	79.7297	14.2857
	22.0588	0	70.6667	3.5461	87.9032	63.1902	75	72.8571	44.9438	30.9352	84.1463	9.89011
	4.23729	6.75676	67.6647	3.14465	60.8392	67.3913	71.9298	62.5	37.7246	33.5294	79.1045	46.4286
	2.34375	0	71.2329	4.58015	78.5124	70.283	79.2308	65.4412	59.2	12.7778	81.9444	28.5714
