# Supplementary figures and images for: Diverse stimuli engage different neutrophil extracellular trap pathways
Source: eLife journal article supplement (doi:10.7554/elife.24437), 2017-06-02

**Figure 8 - figure supplement 1**

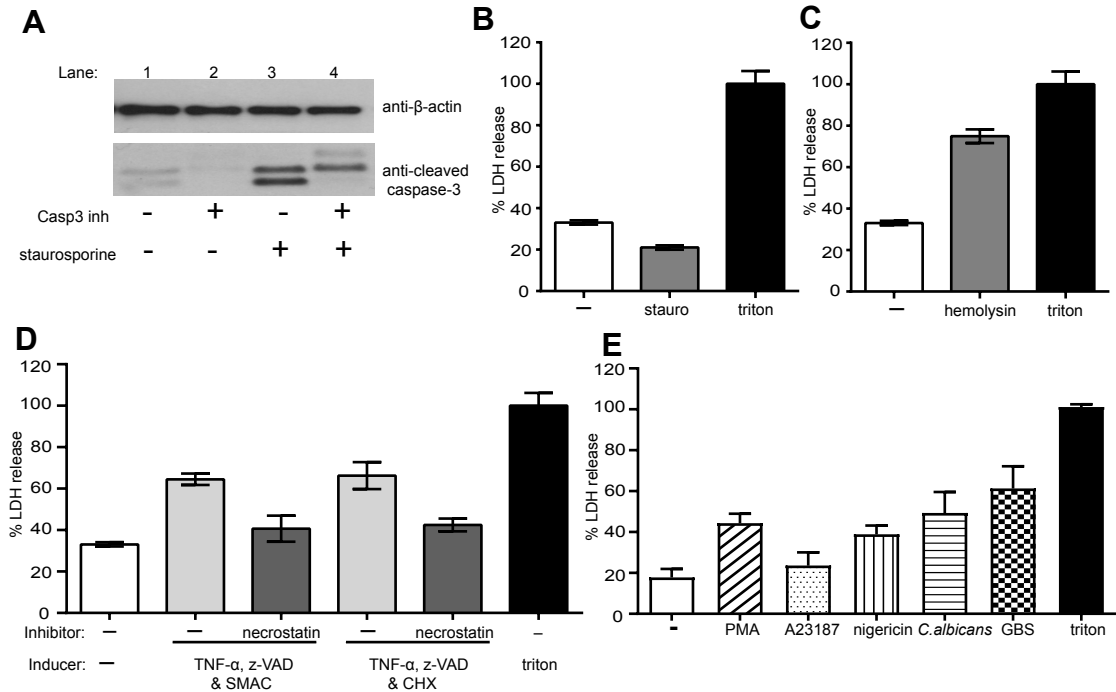

Supplement: supp [file elife-24437-supp-v1.zip]

**Figure 3 - figure supplement 1**

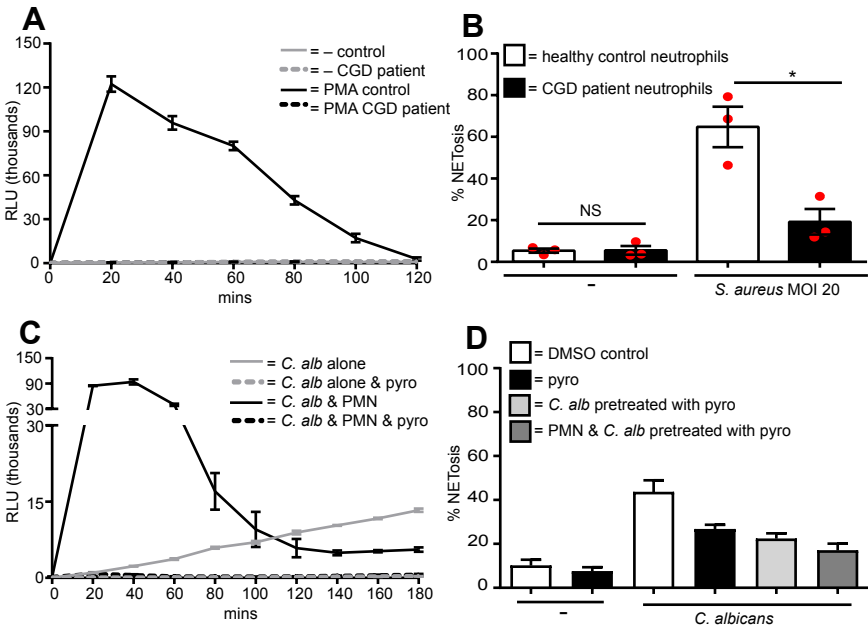

Supplement: supp [file elife-24437-supp-v1.zip]

**Figure 1 - figure supplement 1**

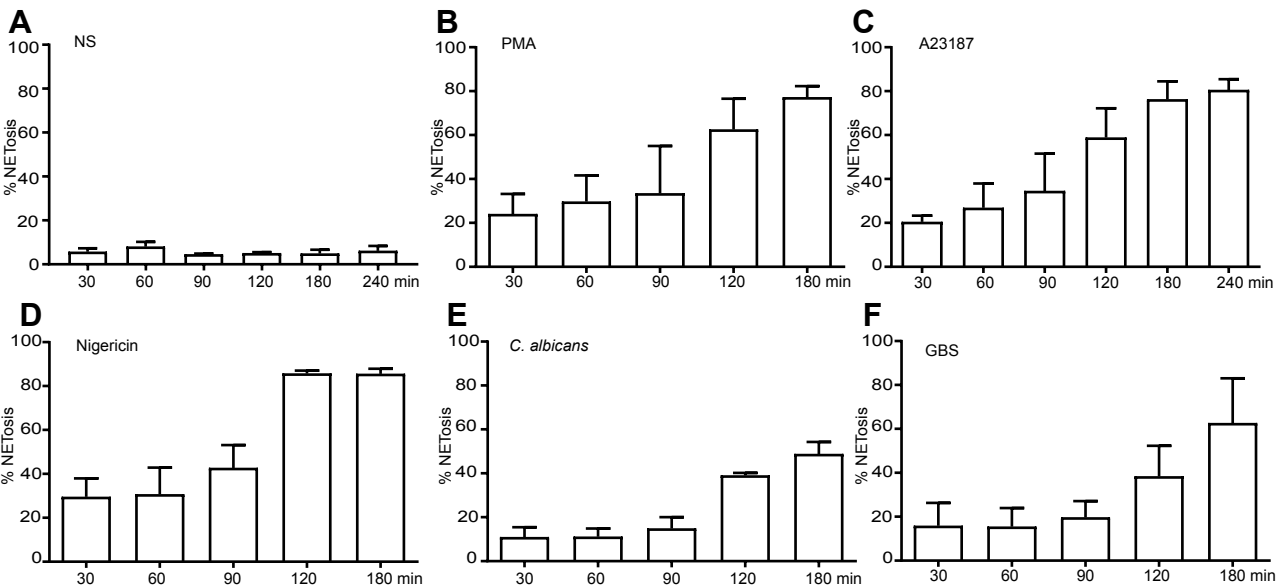

Supplement: supp [file elife-24437-supp-v1.zip]

**Figure 6 - figure supplement 1**

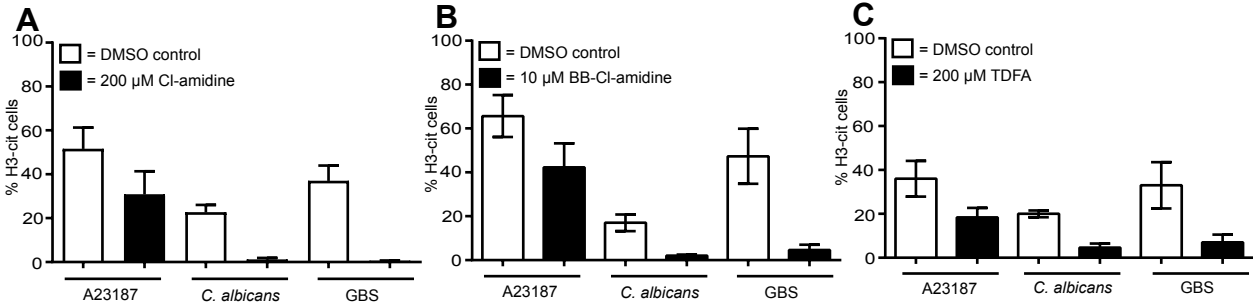

Supplement: supp [file elife-24437-supp-v1.zip]

**Figure 6 - figure supplement 2**

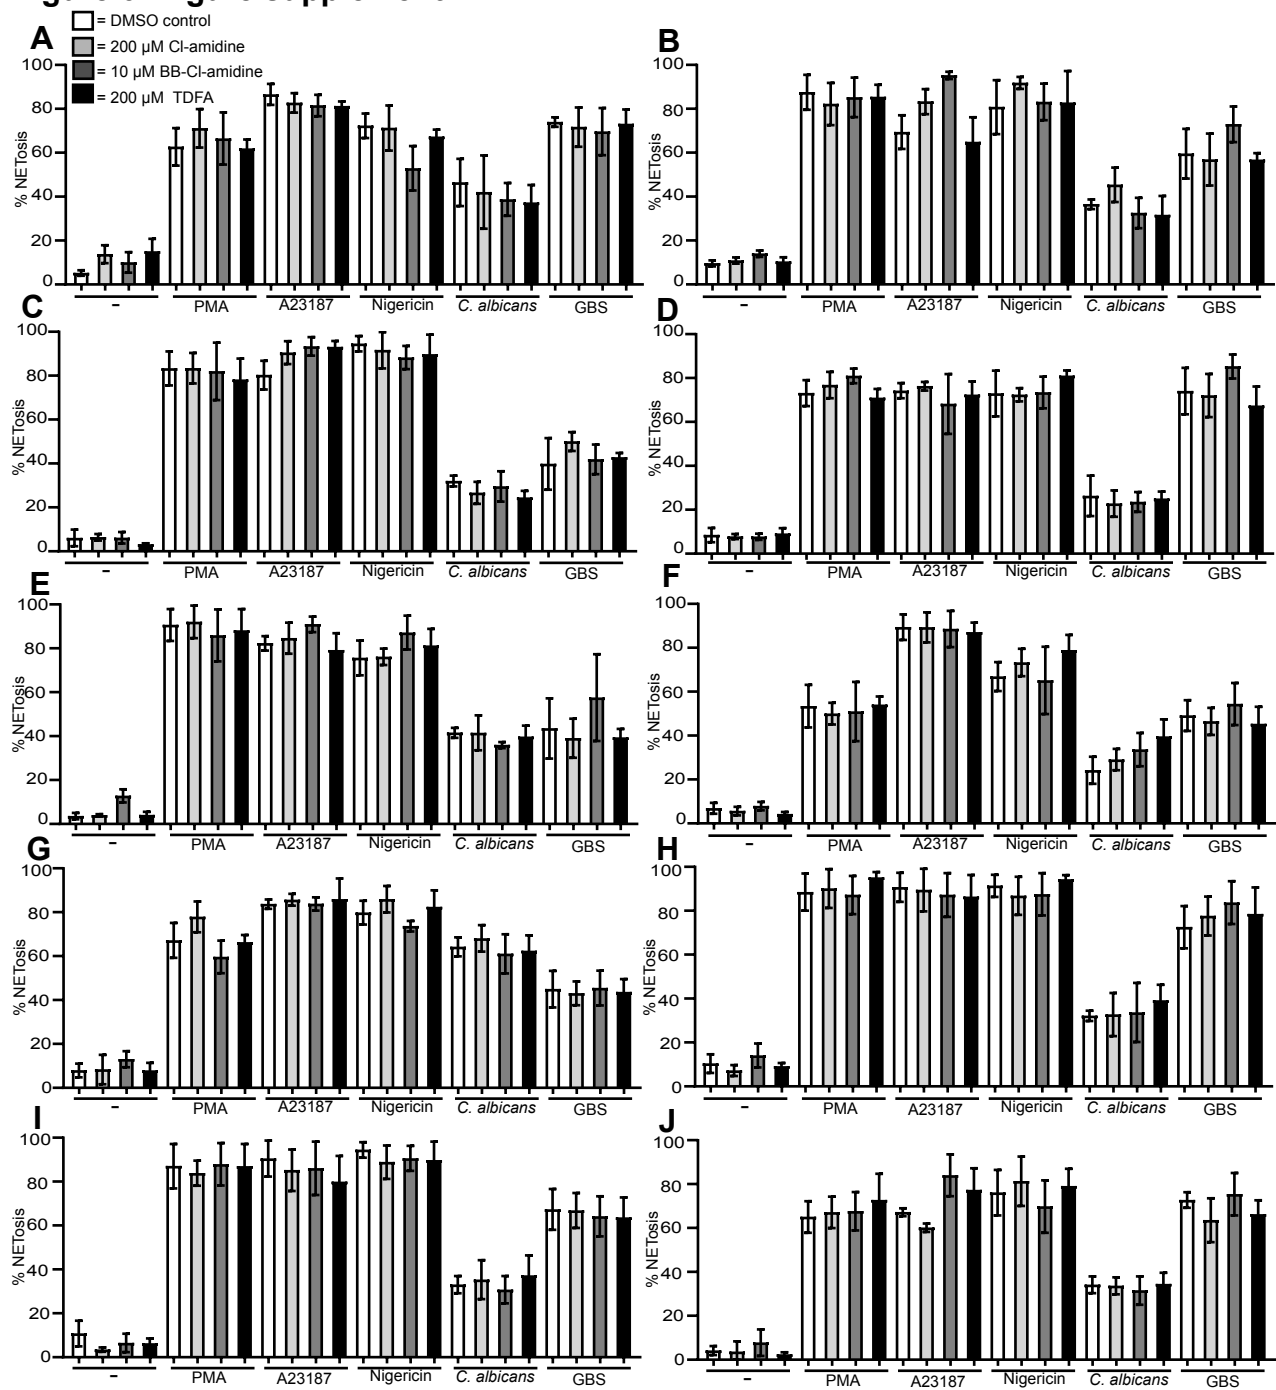

Supplement: supp [file elife-24437-supp-v1.zip]
